# Supplementary material
Source: PubMed Central journal article supplement (PMC2805782)
Supplement: NIHMS143570-supplement-Supp_Data.pdf [file NIHMS143570-supplement-Supp_Data.pdf]

Supplementary information for:

*Plasmodium falciparum* Acyl Carrier Protein Crystal Structures in Disulfide-linked and Reduced States and their Prevalence during Blood Stage Growth.

John R. Gallagher, Sean T. Prigge

---

| <b>Contents</b>                                                  | <b>page</b> |
|------------------------------------------------------------------|-------------|
| Figure S1                                                        |             |
| <i>Pf</i> ACP protein crystals                                   | 2           |
| Figure S2                                                        |             |
| RMSD values between <i>Pf</i> ACP and other closely related ACPs | 2           |
| Figure S3                                                        |             |
| Correlation plot of “Helix Tip Distance” and Pore Depth          | 3           |
| Figure S4                                                        |             |
| Correlation plot of Helix Distance and Helix Crossing Angle      | 3           |
| Figure S5                                                        |             |
| Disulfide-Linked <i>Pf</i> ACP Diffraction Data Statistics       | 4           |
| Figure S6                                                        |             |
| Reduced <i>Pf</i> ACP Diffraction Data Statistics                | 5           |
| Complete Listings for ACP Structural Classification              |             |
| Helix Tip Distance <i>vs</i> Pore Depth                          | 6           |
| Linear Fit of Helix Tip Distance                                 | 7           |
| Positions Defining Helix Tip Distance                            | 7           |
| Helix Distance <i>vs</i> Pore Depth                              | 8           |
| Helix Crossing Angle <i>vs</i> Pore Depth                        | 9           |
| Helix Crossing Angle <i>vs</i> Helix Distance                    | 10          |

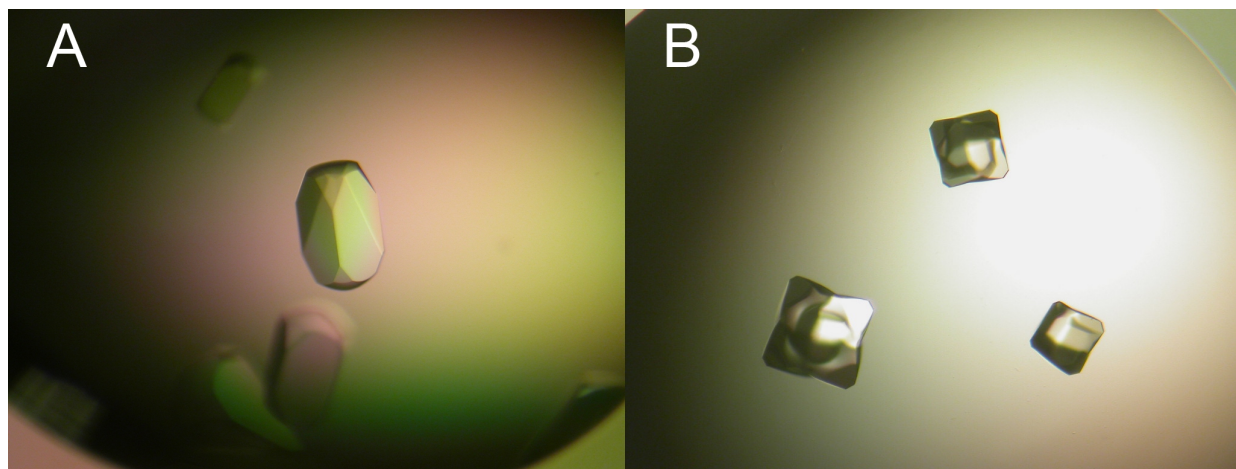

**FIGURE S1**  
Crystals of (A) disulfide-linked *PfACP* and (B) reduced *PfACP*.

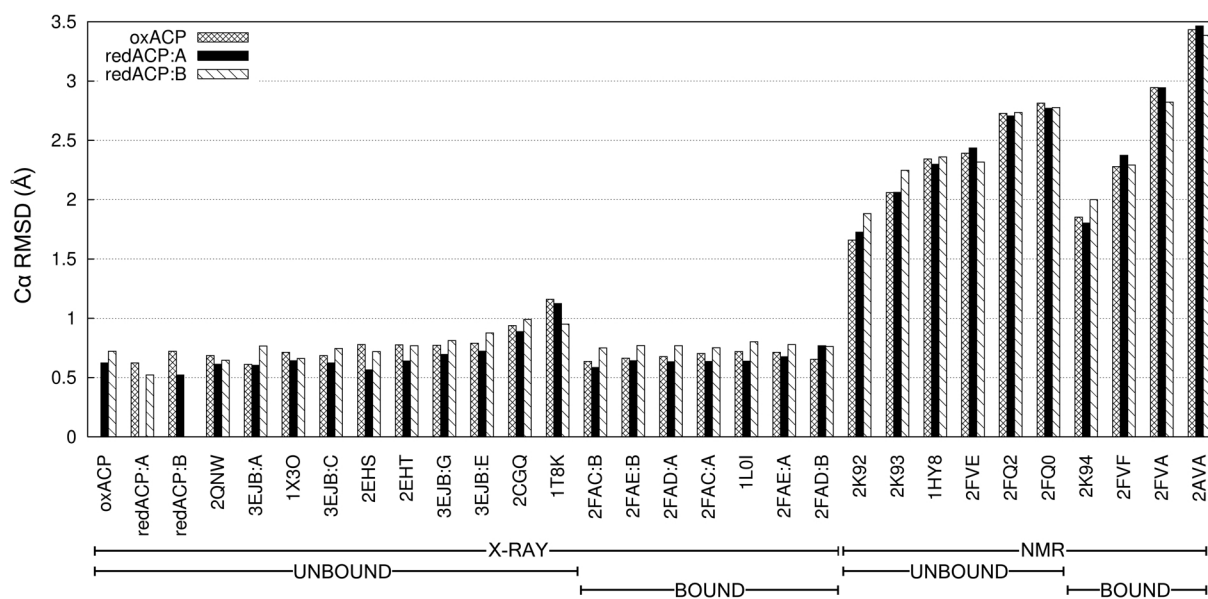

**FIGURE S2**  
RMSD values between reported *PfACP* structures and the existing family of ACP structures. Disulfide-linked *PfACP* is labeled “oxACP”, and reduced *PfACP* is labeled “redACP.” The structure determination method and liganded state are indicated below the corresponding Protein Data Bank accession codes.

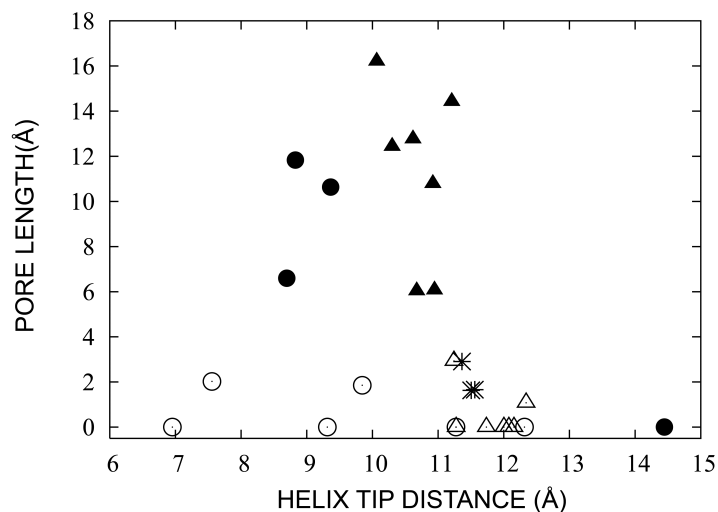

**FIGURE S3**

Test of the “helix tip distance model.” Comparing the distance between N-terminal tips of helices 2 and 3 with observed pore length for representative ACP structures shows no correlation when considering both NMR and crystal structures. Circles represent NMR structures and triangles represent x-ray structures. Filled symbols represent structures with bound ligand and open symbols represent structures without ligand. Asterisks denote *Pf*ACP structures reported here.

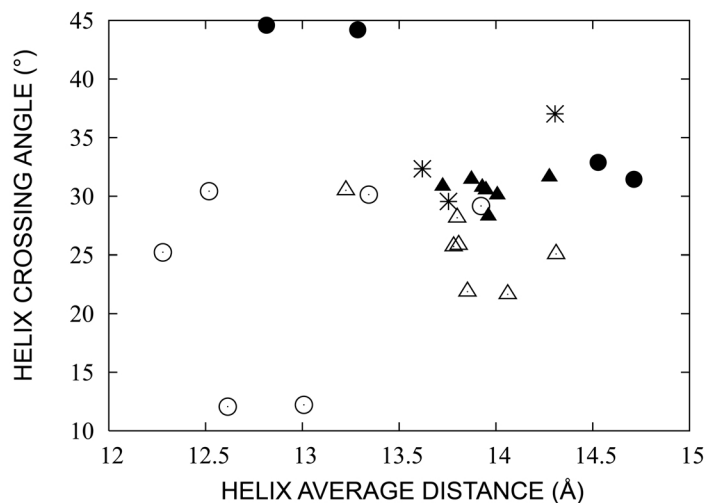

**FIGURE S4**

Comparing the crossing angle of helices 2 and 4 with the average distance between helices 2 and 4 for representative ACP structures shows no correlation. Circles represent NMR structures and triangles represent x-ray structures. Filled symbols represent structures with bound ligand and open symbols represent structures without ligand. Asterisks denote *Pf*ACP structures reported here.

| Resolution                                                                 | #Data | #Theory | %Complete | Redundancy | Mean I | Mean I/s | R(int) | Rsigma |
|----------------------------------------------------------------------------|-------|---------|-----------|------------|--------|----------|--------|--------|
| Inf - 6.80                                                                 | 201   | 211     | 95.3      | 4.62       | 955.8  | 19.87    | 0.0626 | 0.0518 |
| 6.80 - 5.35                                                                | 209   | 209     | 100.0     | 5.66       | 257.9  | 22.45    | 0.0551 | 0.0423 |
| 5.35 - 4.70                                                                | 201   | 201     | 100.0     | 5.84       | 378.2  | 23.40    | 0.0525 | 0.0419 |
| 4.70 - 4.26                                                                | 208   | 208     | 100.0     | 5.90       | 361.5  | 22.73    | 0.0534 | 0.0418 |
| 4.26 - 3.94                                                                | 208   | 208     | 100.0     | 5.93       | 255.9  | 22.13    | 0.0555 | 0.0421 |
| 3.94 - 3.71                                                                | 206   | 206     | 100.0     | 5.93       | 169.3  | 20.71    | 0.0643 | 0.0432 |
| 3.71 - 3.51                                                                | 206   | 206     | 100.0     | 6.04       | 113.2  | 18.95    | 0.0785 | 0.0452 |
| 3.51 - 3.36                                                                | 215   | 215     | 100.0     | 5.99       | 61.5   | 15.96    | 0.0918 | 0.0516 |
| 3.36 - 3.23                                                                | 210   | 210     | 100.0     | 6.07       | 44.0   | 14.17    | 0.1172 | 0.0576 |
| 3.23 - 3.11                                                                | 218   | 218     | 100.0     | 6.09       | 31.6   | 11.80    | 0.1266 | 0.0675 |
| 3.11 - 3.01                                                                | 210   | 210     | 100.0     | 6.04       | 26.1   | 10.79    | 0.1426 | 0.0757 |
| 3.01 - 2.93                                                                | 207   | 207     | 100.0     | 6.10       | 17.7   | 8.75     | 0.1788 | 0.0954 |
| 2.93 - 2.84                                                                | 228   | 228     | 100.0     | 6.08       | 13.6   | 7.39     | 0.1972 | 0.1177 |
| 2.84 - 2.77                                                                | 210   | 210     | 100.0     | 6.01       | 11.5   | 6.52     | 0.2272 | 0.1356 |
| 2.77 - 2.71                                                                | 200   | 200     | 100.0     | 5.78       | 11.9   | 6.53     | 0.2391 | 0.1368 |
| 2.71 - 2.65                                                                | 229   | 229     | 100.0     | 5.65       | 8.1    | 4.64     | 0.3059 | 0.1925 |
| 2.65 - 2.59                                                                | 237   | 237     | 100.0     | 5.31       | 7.7    | 4.41     | 0.2836 | 0.2058 |
| 2.59 - 2.54                                                                | 207   | 207     | 100.0     | 4.53       | 6.9    | 3.66     | 0.3220 | 0.2498 |
| 2.54 - 2.49                                                                | 171   | 177     | 96.6      | 3.22       | 4.6    | 2.32     | 0.3700 | 0.4526 |
| -----                                                                      |       |         |           |            |        |          |        |        |
| 2.59 - 2.49                                                                | 441   | 447     | 98.7      | 4.09       | 5.9    | 3.14     | 0.3336 | 0.3108 |
| Inf - 2.49                                                                 | 3981  | 3997    | 99.6      | 5.64       | 140.9  | 12.95    | 0.0679 | 0.0504 |
| Merged [A], lowest resolution = 43.55 Angstroms, 725 outliers downweighted |       |         |           |            |        |          |        |        |
| -----                                                                      |       |         |           |            |        |          |        |        |
| 3981 Reflections after merging [A], R(int) = 0.0679, R(sigma) = 0.0504     |       |         |           |            |        |          |        |        |

**FIGURE S5**

Diffraction data statistics for disulfide-linked *Pf*ACP collected at 296K on one crystal, as reported by XPREP.

| Resolution                                                                    | #Data | #Theory | %Complete | Redundancy | Mean I | Mean I/s | R(int) | Rsigma |
|-------------------------------------------------------------------------------|-------|---------|-----------|------------|--------|----------|--------|--------|
| Inf - 4.49                                                                    | 1093  | 1096    | 99.7      | 89.92      | 637.4  | 95.07    | 0.1453 | 0.0107 |
| 4.49 - 3.50                                                                   | 1103  | 1103    | 100.0     | 86.12      | 701.6  | 92.00    | 0.1711 | 0.0100 |
| 3.50 - 3.03                                                                   | 1116  | 1116    | 100.0     | 81.92      | 339.0  | 77.64    | 0.2037 | 0.0120 |
| 3.03 - 2.74                                                                   | 1116  | 1116    | 100.0     | 76.92      | 196.0  | 63.37    | 0.2247 | 0.0140 |
| 2.74 - 2.53                                                                   | 1146  | 1146    | 100.0     | 67.83      | 150.0  | 55.79    | 0.2202 | 0.0157 |
| 2.53 - 2.37                                                                   | 1141  | 1141    | 100.0     | 60.88      | 117.2  | 46.23    | 0.2464 | 0.0191 |
| 2.37 - 2.25                                                                   | 1107  | 1107    | 100.0     | 55.90      | 96.6   | 39.70    | 0.2604 | 0.0224 |
| 2.25 - 2.15                                                                   | 1105  | 1105    | 100.0     | 52.32      | 72.9   | 32.08    | 0.2896 | 0.0275 |
| 2.15 - 2.06                                                                   | 1186  | 1186    | 100.0     | 48.87      | 57.5   | 26.22    | 0.3242 | 0.0340 |
| 2.06 - 1.98                                                                   | 1239  | 1239    | 100.0     | 45.33      | 41.2   | 20.02    | 0.3672 | 0.0444 |
| 1.98 - 1.91                                                                   | 1250  | 1250    | 100.0     | 42.50      | 25.3   | 13.65    | 0.4759 | 0.0684 |
| 1.91 - 1.85                                                                   | 1226  | 1226    | 100.0     | 39.11      | 17.6   | 9.89     | 0.5568 | 0.0960 |
| 1.85 - 1.80                                                                   | 1159  | 1159    | 100.0     | 36.91      | 13.1   | 7.65     | 0.6600 | 0.1276 |
| 1.80 - 1.75                                                                   | 1275  | 1275    | 100.0     | 33.30      | 10.0   | 5.77     | 0.7661 | 0.1727 |
| 1.75 - 1.71                                                                   | 1131  | 1131    | 100.0     | 28.02      | 7.4    | 4.04     | 0.8687 | 0.2518 |
| 1.71 - 1.67                                                                   | 1270  | 1270    | 100.0     | 22.62      | 6.7    | 3.20     | 0.9934 | 0.3199 |
| 1.67 - 1.63                                                                   | 1370  | 1370    | 100.0     | 12.79      | 10.6   | 3.13     | 1.0091 | 0.3152 |
| 1.63 - 1.60                                                                   | 1109  | 1120    | 99.0      | 6.15       | 22.8   | 2.93     | 0.9572 | 0.3019 |
| 1.60 - 1.55                                                                   | 681   | 1729    | 39.4      | 0.92       | 37.0   | 2.08     | 0.5786 | 0.3563 |
| -----                                                                         |       |         |           |            |        |          |        |        |
| 1.65 - 1.55                                                                   | 2841  | 3900    | 72.8      | 5.18       | 22.2   | 2.85     | 0.9493 | 0.3242 |
| Inf - 1.55                                                                    | 21823 | 22885   | 95.4      | 44.77      | 130.3  | 31.05    | 0.1986 | 0.0252 |
| Merged [A], lowest resolution = 54.18 Angstroms, 309907 outliers downweighted |       |         |           |            |        |          |        |        |
| -----                                                                         |       |         |           |            |        |          |        |        |
| 21823 Reflections after merging [A], R(int) = 0.1986, R(sigma) = 0.0252       |       |         |           |            |        |          |        |        |

**FIGURE S6**

Diffraction data statistics for reduced *Pf*ACP collected at 100K on 4 crystals, as reported by XPREP.

# Pore Length vs. "Helix Tip Distance"

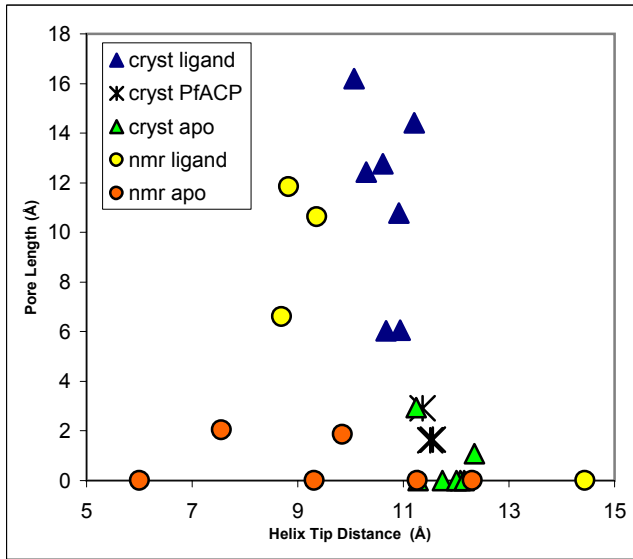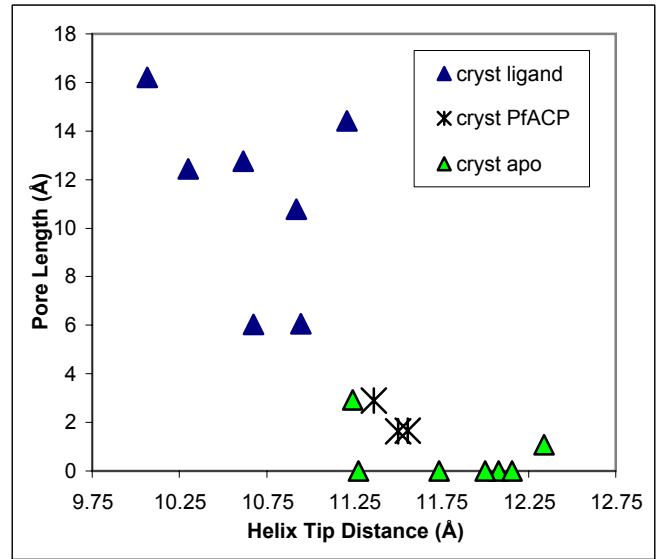

| pdbFile    | helix Tip Dist (Å) | CAVER Pore Length (Å) | crystal | ligand | PfACP crystal |
|------------|--------------------|-----------------------|---------|--------|---------------|
| 2FQ2       | 11.272             | 0                     | 0       | 0      | 0             |
| 2FVE       | 9.314              | 0                     | 0       | 0      | 0             |
| 1HY8       | 9.844              | 1.8575                | 0       | 0      | 0             |
| 2K93       | 7.557              | 2.0252                | 0       | 0      | 0             |
| 2FQ0       | 12.315             | 0                     | 0       | 0      | 0             |
| 2K92       | 6.954              | 0                     | 0       | 0      | 0             |
| 2AVA       | 8.696              | 6.5995                | 0       | 1      | 0             |
| 2K94       | 14.446             | 0                     | 0       | 1      | 0             |
| 2FVF       | 9.364              | 10.6338               | 0       | 1      | 0             |
| 2FVA       | 8.825              | 11.835                | 0       | 1      | 0             |
| 2CGQ       | 11.736             | 0                     | 1       | 0      | 0             |
| 2EHS       | 12.078             | 0                     | 1       | 0      | 0             |
| 2EHT       | 12.003             | 0                     | 1       | 0      | 0             |
| 2QNW       | 11.241             | 2.9297                | 1       | 0      | 0             |
| 1X3O       | 11.275             | 0                     | 1       | 0      | 0             |
| 1T8K       | 12.34              | 1.0769                | 1       | 0      | 0             |
| 1L0H       | 12.156             | 0                     | 1       | 0      | 0             |
| redPfACP:A | 11.364             | 2.9057                | 1       | 0      | 1             |
| redPfACP:B | 11.504             | 1.6284                | 1       | 0      | 1             |
| oxPfACP    | 11.558             | 1.6594                | 1       | 0      | 1             |
| 2FAD:A     | 10.617             | 12.7641               | 1       | 1      | 0             |
| 2FAC:B     | 10.921             | 10.7897               | 1       | 1      | 0             |
| 2FAE:A     | 10.3               | 12.4318               | 1       | 1      | 0             |
| 2FAE:B     | 11.208             | 14.4232               | 1       | 1      | 0             |
| 2FAD:B     | 10.945             | 6.0697                | 1       | 1      | 0             |
| 1L0I       | 10.674             | 6.0335                | 1       | 1      | 0             |
| 2FAC:A     | 10.065             | 16.2071               | 1       | 1      | 0             |

## Linear Fit of X-Ray Structures for "Helix Tip Distance"

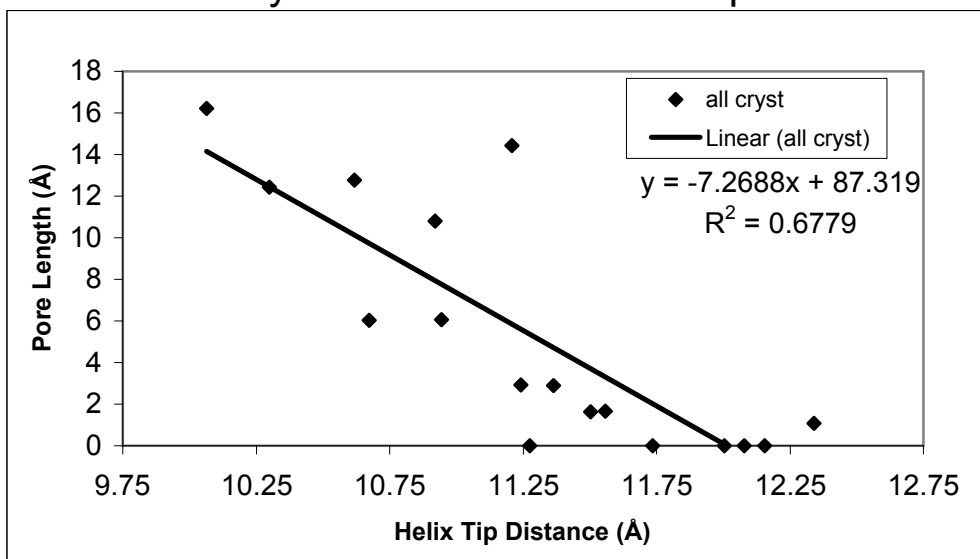

### Positions Homologous to EcACP T39-D56

|     |    |     |    |                |
|-----|----|-----|----|----------------|
| VAL | 39 | ASP | 56 | 1HY8.pdb       |
| THR | 39 | ASP | 56 | 1L0H.pdb       |
| THR | 39 | ASP | 56 | 1L0I.pdb       |
| THR | 39 | ASP | 56 | 1T8K.pdb       |
| THR | 42 | ASP | 59 | 1X3O.pdb       |
| THR | 41 | GLU | 58 | 2AVA.pdb       |
| LEU | 36 | PHE | 53 | 2CGQ.pdb       |
| VAL | 38 | ASP | 55 | 2EHS.pdb       |
| VAL | 38 | ASP | 55 | 2EHT.pdb       |
| THR | 39 | ASP | 56 | 2FAC:A.pdb     |
| THR | 39 | ASP | 56 | 2FAC:B.pdb     |
| THR | 39 | ASP | 56 | 2FAD:A.pdb     |
| THR | 39 | ASP | 56 | 2FAD:B.pdb     |
| THR | 39 | ASP | 56 | 2FAE:A.pdb     |
| THR | 39 | ASP | 56 | 2FAE:B.pdb     |
| LEU | 40 | ASP | 57 | 2FQ0.pdb       |
| LEU | 40 | ASP | 57 | 2FQ2.pdb       |
| THR | 41 | GLU | 58 | 2FVA.pdb       |
| THR | 41 | GLU | 58 | 2FVE.pdb       |
| THR | 41 | GLU | 58 | 2FVF.pdb       |
| THR | 39 | ASP | 56 | 2K92.pdb       |
| THR | 39 | ASP | 56 | 2K93.pdb       |
| THR | 39 | ASP | 56 | 2K94.pdb       |
| SER | 44 | ASP | 61 | 2QNW.pdb       |
| LEU | 42 | ASP | 59 | redPfACP:A.pdb |
| LEU | 42 | ASP | 59 | redPfACP:B.pdb |
| LEU | 42 | ASP | 59 | oxPfACP.pdb    |

# Pore Length vs. Helix Distance

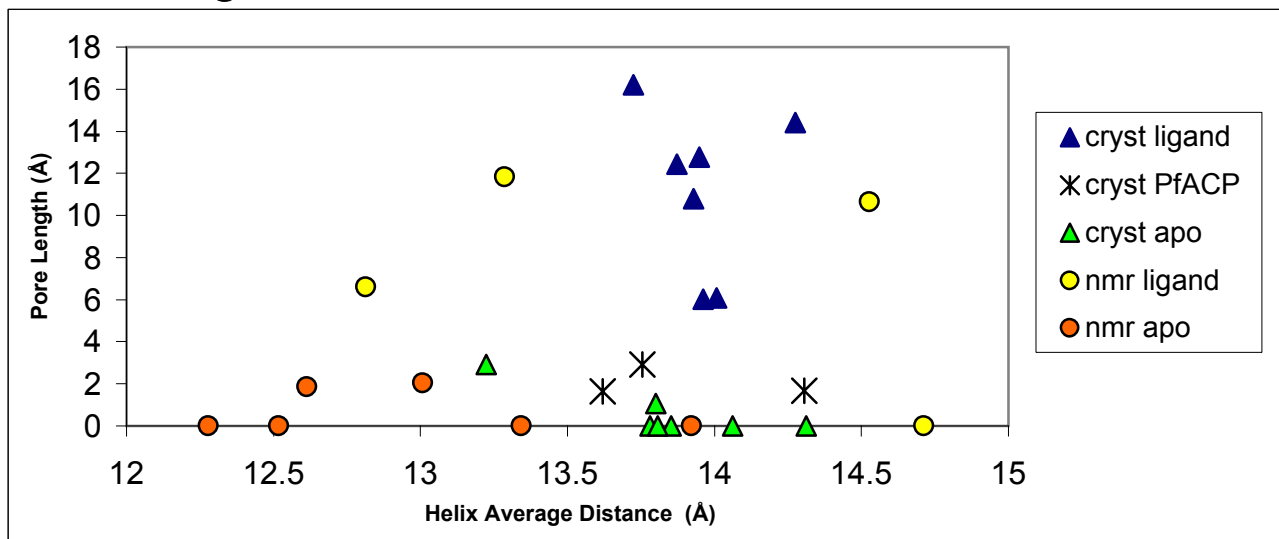

Data for helices 2 and 3

| pdbFile    | Helix Dist (Å) | CAVER Pore Length (Å) | PfACP |        |         |
|------------|----------------|-----------------------|-------|--------|---------|
|            |                |                       | cryst | ligand | crystal |
| 2FQ2       | 12.5185        | 0                     | 0     | 0      | 0       |
| 2FVE       | 13.923         | 0                     | 0     | 0      | 0       |
| 1HY8       | 12.614         | 1.8575                | 0     | 0      | 0       |
| 2K93       | 13.008         | 2.0252                | 0     | 0      | 0       |
| 2FQ0       | 12.2795        | 0                     | 0     | 0      | 0       |
| 2K92       | 13.343         | 0                     | 0     | 0      | 0       |
| 2AVA       | 12.8145        | 6.5995                | 0     | 1      | 0       |
| 2K94       | 14.713         | 0                     | 0     | 1      | 0       |
| 2FVF       | 14.528         | 10.6338               | 0     | 1      | 0       |
| 2FVA       | 13.286         | 11.835                | 0     | 1      | 0       |
| 2CGQ       | 14.311         | 0                     | 1     | 0      | 0       |
| 2EHS       | 13.853         | 0                     | 1     | 0      | 0       |
| 2EHT       | 14.061         | 0                     | 1     | 0      | 0       |
| 2QNW       | 13.2245        | 2.9297                | 1     | 0      | 0       |
| 1X3O       | 13.7815        | 0                     | 1     | 0      | 0       |
| 1T8K       | 13.8           | 1.0769                | 1     | 0      | 0       |
| 1L0H       | 13.8075        | 0                     | 1     | 0      | 0       |
| redPfACP:A | 13.755         | 2.9057                | 1     | 0      | 1       |
| redPfACP:B | 13.62          | 1.6284                | 1     | 0      | 1       |
| oxPfACP    | 14.305         | 1.6594                | 1     | 0      | 1       |
| 2FAD:A     | 13.948         | 12.7641               | 1     | 1      | 0       |
| 2FAC:B     | 13.929         | 10.7897               | 1     | 1      | 0       |
| 2FAE:A     | 13.873         | 12.4318               | 1     | 1      | 0       |
| 2FAE:B     | 14.276         | 14.4232               | 1     | 1      | 0       |
| 2FAD:B     | 14.007         | 6.0697                | 1     | 1      | 0       |
| 1L0I       | 13.961         | 6.0335                | 1     | 1      | 0       |
| 2FAC:A     | 13.7245        | 16.2071               | 1     | 1      | 0       |



# Helix Crossing Angle vs. Pore Length

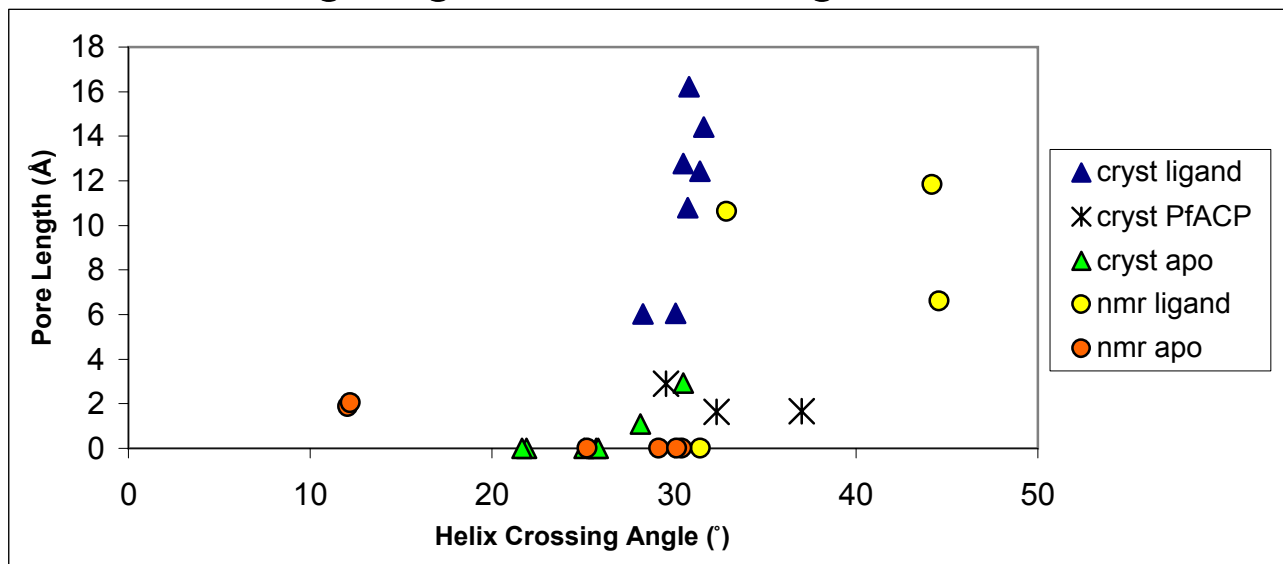

| pdbFile    | Helix Angle (°) | CAVER Pore |       | PfACP  |         |
|------------|-----------------|------------|-------|--------|---------|
|            |                 | Length (Å) | cryst | ligand | Crystal |
| 2FQ2       | 30.4266         | 0          | 0     | 0      | 0       |
| 2FVE       | 29.1612         | 0          | 0     | 0      | 0       |
| 1HY8       | 12.0675         | 1.8575     | 0     | 0      | 0       |
| 2K93       | 12.2236         | 2.0252     | 0     | 0      | 0       |
| 2FQ0       | 25.2164         | 0          | 0     | 0      | 0       |
| 2K92       | 30.1441         | 0          | 0     | 0      | 0       |
| 2AVA       | 44.5943         | 6.5995     | 0     | 1      | 0       |
| 2K94       | 31.4511         | 0          | 0     | 1      | 0       |
| 2FVF       | 32.8832         | 10.6338    | 0     | 1      | 0       |
| 2FVA       | 44.2044         | 11.835     | 0     | 1      | 0       |
| 2CGQ       | 25.0653         | 0          | 1     | 0      | 0       |
| 2EHS       | 21.8701         | 0          | 1     | 0      | 0       |
| 2EHT       | 21.6547         | 0          | 1     | 0      | 0       |
| 2QNW       | 30.4957         | 2.9297     | 1     | 0      | 0       |
| 1X3O       | 25.7073         | 0          | 1     | 0      | 0       |
| 1T8K       | 28.1617         | 1.0769     | 1     | 0      | 0       |
| 1L0H       | 25.8288         | 0          | 1     | 0      | 0       |
| redPfACP:A | 29.5488         | 2.9057     | 1     | 0      | 1       |
| redPfACP:B | 32.3367         | 1.6284     | 1     | 0      | 1       |
| oxPfACP    | 37.0286         | 1.6594     | 1     | 0      | 1       |
| 2FAD:A     | 30.5179         | 12.7641    | 1     | 1      | 0       |
| 2FAC:B     | 30.7428         | 10.7897    | 1     | 1      | 0       |
| 2FAE:A     | 31.4234         | 12.4318    | 1     | 1      | 0       |
| 2FAE:B     | 31.6199         | 14.4232    | 1     | 1      | 0       |
| 2FAD:B     | 30.0963         | 6.0697     | 1     | 1      | 0       |
| 1L0I       | 28.2864         | 6.0335     | 1     | 1      | 0       |
| 2FAC:A     | 30.8338         | 16.2071    | 1     | 1      | 0       |

# Helix Crossing Angle vs. Helix Distance

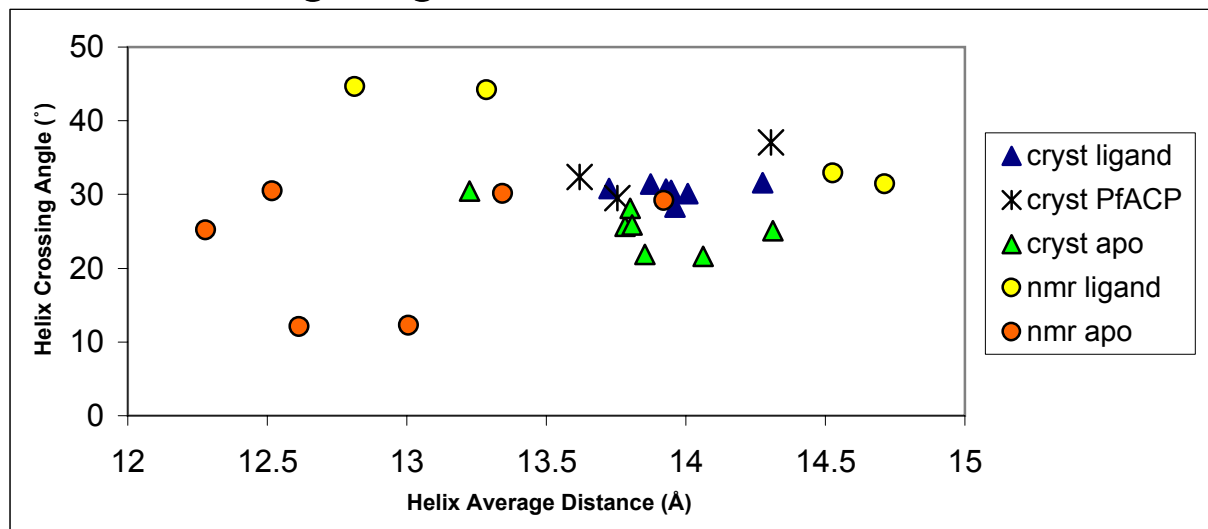

| pdbFile    | Data for helices 2 and 4 |                | Data for helices 2 and 3 |        |               |
|------------|--------------------------|----------------|--------------------------|--------|---------------|
|            | Helix Angle (°)          | Helix Dist (Å) | cryst                    | ligand | PfACP Crystal |
| 2FQ2       | 30.4266                  | 12.5185        | 0                        | 0      | 0             |
| 2FVE       | 29.1612                  | 13.923         | 0                        | 0      | 0             |
| 1HY8       | 12.0675                  | 12.614         | 0                        | 0      | 0             |
| 2K93       | 12.2236                  | 13.008         | 0                        | 0      | 0             |
| 2FQ0       | 25.2164                  | 12.2795        | 0                        | 0      | 0             |
| 2K92       | 30.1441                  | 13.343         | 0                        | 0      | 0             |
| 2AVA       | 44.5943                  | 12.8145        | 0                        | 1      | 0             |
| 2K94       | 31.4511                  | 14.713         | 0                        | 1      | 0             |
| 2FVF       | 32.8832                  | 14.528         | 0                        | 1      | 0             |
| 2FVA       | 44.2044                  | 13.286         | 0                        | 1      | 0             |
| 2CGQ       | 25.0653                  | 14.311         | 1                        | 0      | 0             |
| 2EHS       | 21.8701                  | 13.853         | 1                        | 0      | 0             |
| 2EHT       | 21.6547                  | 14.061         | 1                        | 0      | 0             |
| 2QNW       | 30.4957                  | 13.2245        | 1                        | 0      | 0             |
| 1X3O       | 25.7073                  | 13.7815        | 1                        | 0      | 0             |
| 1T8K       | 28.1617                  | 13.8           | 1                        | 0      | 0             |
| 1LOH       | 25.8288                  | 13.8075        | 1                        | 0      | 0             |
| redPfACP:A | 29.5488                  | 13.755         | 1                        | 0      | 1             |
| redPfACP:B | 32.3367                  | 13.62          | 1                        | 0      | 1             |
| oxPfACP    | 37.0286                  | 14.305         | 1                        | 0      | 1             |
| 2FAD:A     | 30.5179                  | 13.948         | 1                        | 1      | 0             |
| 2FAC:B     | 30.7428                  | 13.929         | 1                        | 1      | 0             |
| 2FAE:A     | 31.4234                  | 13.873         | 1                        | 1      | 0             |
| 2FAE:B     | 31.6199                  | 14.276         | 1                        | 1      | 0             |
| 2FAD:B     | 30.0963                  | 14.007         | 1                        | 1      | 0             |
| 1LOI       | 28.2864                  | 13.961         | 1                        | 1      | 0             |
| 2FAC:A     | 30.8338                  | 13.7245        | 1                        | 1      | 0             |
